# Supplementary material for: The E3 Ligase TRIM25 Impairs Apoptotic Cell Death in Colon Carcinoma Cells via Destabilization of Caspase-7 mRNA: A Possible Role of hnRNPH1
Source: Cells. 2023 Jan 3;12(1):201. doi: 10.3390/cells12010201 (PMC9818768; doi:10.3390/cells12010201)
Supplement: Supplementary file 1 [file cells-12-00201-s001.zip › Suppl. Table S1 .xlsx]

## Sheet: Sheet1
Accession	Gene Symbol	log2(siTRIM25/siControl)	p-values
Q99959	PKP2	-0.504491	0.017268
Q6ZNB6	NFXL1	-0.507906	0.00216231
A3KN83	SBNO1	-0.509911	0.011812
P11474	ESRRA	-0.510725	0.0275888
Q8WWQ0	PHIP	-0.510803	0.0330334
Q7Z7E8	UBE2Q1	-0.511272	0.0147251
P67812	SEC11A	-0.514506	0.00341644
P27707	DCK	-0.516642	0.00151089
Q00059	TFAM	-0.521636	0.0111666
P35609	ACTN2	-0.522741	0.0181022
Q15172	PPP2R5A	-0.52395	0.0157865
Q9Y6A4	C16orf80; CFAP20	-0.526001	0.00584736
Q93034	CUL5	-0.527467	0.0494838
Q9BQ70	TCF25	-0.528618	0.0113967
Q9BYT8	NLN	-0.531004	0.00245602
Q6ZMG9	CERS6	-0.531424	0.00893446
Q14CX7	NAA25	-0.532953	0.00269174
P53671	LIMK2	-0.53378	0.00455258
Q9HDC5	JPH1	-0.538071	0.00198612
Q96ST2	IWS1	-0.542998	0.0354846
Q9GZZ9	UBA5	-0.544872	0.00485741
Q8NB16	MLKL	-0.545212	0.00666889
Q99856	ARID3A	-0.551058	0.02253
Q9HC21	SLC25A19	-0.55513	0.0051223
Q8N3U4	STAG2	-0.561288	0.0233596
P48449	LSS	-0.563368	0.00777881
Q969P0	IGSF8	-0.565134	0.0128173
P61009	SPCS3	-0.569521	0.00268584
O14733	MAP2K7	-0.576314	0.000920337
O75884	RBBP9	-0.586668	0.000109085
Q9H8H2	DDX31	-0.593366	5.32222e-05
Q13867	BLMH	-0.593957	0.000635419
Q8TDN6	BRIX1	-0.598638	0.0104689
Q16881	TXNRD1	-0.606559	0.000442983
Q9NXX6	NSMCE4A	-0.609351	0.0157004
Q86Y56	HEATR2; DNAAF5	-0.60986	0.00190991
Q9H8M7	FAM188A; MINDY3	-0.611931	0.00146176
Q9Y4X5	ARIH1	-0.611933	0.000377542
Q8WU10	PYROXD1	-0.613434	0.0199173
Q92541	RTF1	-0.617563	0.00514948
Q9P0L0	VAPA	-0.622863	0.000390002
Q5T3F8	TMEM63B	-0.624255	0.0461646
P20020	ATP2B1	-0.634785	0.000563087
Q9H5Q4	TFB2M	-0.648921	0.0130319
P57088	TMEM33	-0.658135	0.0409745
Q96QD9	FYTTD1	-0.659336	0.0251649
Q16720	ATP2B3	-0.662167	0.000842368
O75915	ARL6IP5	-0.673697	0.027362
Q96GY0	ZC2HC1A	-0.676872	0.0097638
O75351	VPS4B	-0.681498	0.0280191
A0MZ66	KIAA1598; SHTN1	-0.692949	0.0118618
Q969M3	YIPF5	-0.697352	0.0012885
P50148	GNAQ	-0.703321	0.0199323
Q15070	OXA1L	-0.711878	0.00576436
Q9UL18	AGO1; EIF2C1	-0.727981	0.00248109
Q9Y282	ERGIC3	-0.72816	0.00247924
Q6P087	RPUSD3	-0.729168	0.000861193
O00220	TNFRSF10A	-0.739044	0.0221328
Q8TCT8	SPPL2A	-0.739549	0.0166417
Q9BQE4	VIMP; SELENOS	-0.754904	0.0128404
Q5VTE6	ANGEL2	-0.759357	0.00167066
O60942	RNGTT	-0.769514	0.000836221
P33527	ABCC1	-0.770342	0.00431691
Q8NBT2	SPC24	-0.777404	0.0449998
Q08623	HDHD1; PUDP	-0.778404	0.0018923
Q92845	KIFAP3	-0.781435	0.00431778
P31150	GDI1	-0.811912	0.0102242
P48651	PTDSS1	-0.816116	0.00797509
O75381	PEX14	-0.833799	0.00516623
Q96RQ1	ERGIC2	-0.861147	0.00667165
Q9UMY4	SNX12	-0.865718	0.0104809
Q9BTV4	TMEM43	-0.90774	0.0041991
Q9BY50	SEC11C	-0.915716	0.0145672
Q96KB5	PBK	-0.921101	0.0131471
Q86TI2	DPP9	-0.932216	0.000255824
Q6PIU2	NCEH1	-0.93327	0.000560668
O75387	SLC43A1	-0.938472	0.000971161
Q13247	SRSF6	-0.953548	0.0019733
Q9Y666	SLC12A7	-1.00557	0.00157188
Q08211	DHX9	-1.04487	0.000503094
Q9UJS0	SLC25A13	-1.06406	0.000296338
P15104	GLUL	-1.09064	0.048806
Q6IAN0	DHRS7B	-1.22428	0.00777063
P35226	BMI1; COMMD3-BMI1	-1.3629	0.00602565
Q9P035	PTPLAD1; HACD3	-1.52458	0.0017389
Q14258	TRIM25	-2.37329	0.000113543
Q8IWB7	WDFY1	1.45015	0.00745555
P55210	CASP7	1.38342	6.8016e-05
Q6NZI2	PTRF; CAVIN1	1.32852	0.00202485
Q00534	CDK6	1.28358	0.00120832
P04083	ANXA1	1.27074	0.000145186
Q9BQS8	FYCO1	1.2677	0.0128606
Q8N6M0	OTUD6B	1.19122	0.000111373
Q8IV50	LYSMD2	1.1303	0.00467829
Q9NXE8	CWC25	1.13015	0.0345425
Q9UBN6	TNFRSF10D	1.11186	0.00182945
Q5W041	ARMC3	1.05645	0.0149975
Q9BTX7	TTPAL	1.05151	0.0398791
Q86U90	YRDC	1.03642	0.0028124
Q03135	CAV1	0.984322	0.000864272
P05556	ITGB1	0.923916	0.0035094
P58335	ANTXR2	0.920099	0.000333658
Q9H910	HN1L; JPT2	0.900171	0.0307258
Q5H9R7	PPP6R3	0.8993	0.00387729
O75886	STAM2	0.894871	0.0138817
O14907	TAX1BP3	0.871343	0.0187913
O43493	TGOLN2	0.870579	0.0081864
Q9BRL6	SRSF8	0.86461	0.000735854
Q9BZK7	TBL1XR1	0.864541	0.000488364
Q9HCE1	MOV10	0.863525	0.00194455
P60903	S100A10	0.840423	0.00224095
Q9HCN8	SDF2L1	0.836316	0.0277913
O14763	TNFRSF10B	0.835543	0.0366702
O43815	STRN	0.82333	0.000327355
Q6IMN6	CAPRIN2	0.799244	0.0135969
Q8IZ07	ANKRD13A	0.792612	0.00999944
Q9NYS0	NKIRAS1	0.788161	0.0127047
Q8NB46	ANKRD52	0.785385	0.00153819
P53367	ARFIP1	0.782499	0.0101384
P23497	SP100	0.770796	0.0024384
Q9GZX9	TWSG1	0.77062	0.015399
P40222	TXLNA	0.767801	0.010358
O95881	TXNDC12	0.763464	0.00183201
Q9BYT9	ANO3	0.760534	0.00890541
P45973	CBX5	0.751364	0.0304792
O43504	LAMTOR5	0.75046	8.93601e-05
P05067	APP	0.742059	0.00248068
Q0JRZ9	FCHO2	0.737186	0.000761931
Q32P28	LEPRE1; P3H1	0.726839	0.0109089
Q9P270	SLAIN2	0.725427	0.0226182
Q9H9B4	SFXN1	0.717004	0.00682309
Q9NTM9	CUTC	0.714182	0.000890999
P35080	PFN2	0.71052	0.00334804
O43169	CYB5B	0.707558	0.0383448
Q7Z417	NUFIP2	0.702696	0.00907713
Q13751	LAMB3	0.701146	0.00401067
Q5JTD0	TJAP1	0.683704	0.0224722
Q9NW75	GPATCH2	0.681543	0.0345759
Q8N8S7	ENAH	0.677592	0.00129669
O15116	LSM1	0.676939	0.0108268
P11021	HSPA5	0.673637	0.00349206
Q8NBU5	ATAD1	0.666837	0.0274818
P42684	ABL2	0.663044	0.0144834
Q9H5Z1	DHX35	0.655715	0.039232
P20700	LMNB1	0.654002	0.0210031
Q13404	UBE2V1; TMEM189-UBE2V1	0.652461	0.00377835
Q01581	HMGCS1	0.647529	0.017799
Q71UM5	RPS27L	0.645853	0.0153342
Q9UKY7	CDV3	0.642674	0.0326259
Q8IW35	CEP97	0.638075	0.00234621
Q96H79	ZC3HAV1L	0.637698	0.000255057
Q9BUE6	ISCA1	0.637589	0.00322408
Q8WW59	SPRYD4	0.637422	0.000217802
Q15773	MLF2	0.634457	0.00291803
O95816	BAG2	0.634028	0.00427412
P21291	CSRP1	0.629008	0.00610986
Q9UGP4	LIMD1	0.628657	0.00391247
P28347	TEAD1	0.62691	0.0284357
Q16563	SYPL1	0.626048	0.0106148
Q9H4A5	GOLPH3L	0.62521	0.00895471
P82970	HMGN5	0.625129	0.0200597
Q8IYS1	PM20D2	0.62293	0.000425236
P53985	SLC16A1	0.622831	0.0013586
Q9Y281	CFL2	0.621694	0.00485511
Q05682	CALD1	0.620328	0.0345333
P30154	PPP2R1B	0.618999	0.00626036
O75718	CRTAP	0.617428	0.00757985
P35222	CTNNB1	0.616973	0.015324
Q9Y6M7	SLC4A7	0.603809	0.0230202
Q14289	PTK2B	0.603165	0.00659885
Q9UM00	TMCO1	0.596943	0.0018679
Q27J81	INF2	0.596701	0.00712264
O75874	IDH1	0.592473	0.00190147
P07711	CTSL; CTSL1	0.592212	0.0205356
Q8NEF9	SRFBP1	0.591389	0.00135665
Q07065	CKAP4	0.589838	0.000881975
Q9Y3B3	TMED7; TMED7-TICAM2	0.588357	0.000450195
Q9H2H8	PPIL3	0.587899	0.0487399
O43852	CALU	0.587213	0.012397
P11047	LAMC1	0.585491	0.0286984
P49247	LOC101060545; RPIA	0.584678	0.0292384
O14933	UBE2L6	0.583846	0.00301196
P55854	SUMO3	0.582056	0.0434302
Q15417	CNN3	0.581777	0.0401078
P09382	LGALS1	0.58037	0.0413594
Q14678	KANK1	0.580231	0.000720116
Q13011	ECH1	0.579957	0.00172921
P52594	AGFG1	0.578098	0.0270621
Q7Z4H8	KDELC2	0.577014	0.00139636
Q5HYK7	SH3D19	0.565114	0.00521717
P55145	MANF	0.563384	0.000876615
P98179	RBM3	0.559376	0.0128057
Q13243	SRSF5	0.557468	0.0011957
Q7L1T6	CYB5R4	0.5498	0.00104628
Q9NPB8	GPCPD1	0.547077	0.0345591
Q13438	OS9	0.545675	0.00209572
Q13526	PIN1	0.543709	0.0447995
A6NIH7	UNC119B	0.541127	0.0328651
Q9UBS4	DNAJB11	0.540887	0.00322096
O60488	ACSL4	0.540323	0.0242174
Q15691	MAPRE1	0.5392	0.0171196
P11279	LAMP1	0.538987	0.024179
Q9BXF6	RAB11FIP5	0.53831	0.00375833
P01588	EPO	0.535881	0.028045
P26006	ITGA3	0.532425	0.00114123
P35613	BSG	0.531691	0.00587712
P49458	SRP9; SRP9P1	0.529311	0.0136837
Q8NBI6	XXYLT1	0.526202	0.00212048
Q9NV56	MRGBP	0.525847	0.0360175
P26885	FKBP2	0.525571	0.0300309
Q16204	CCDC6	0.525557	0.00874843
Q96HN2	AHCYL2	0.523385	0.000616248
Q07960	ARHGAP1	0.523265	0.00499336
P49585	PCYT1A	0.52123	0.00511545
Q9UIJ7	AK3	0.520469	0.00116939
O95865	DDAH2	0.519588	0.0187111
P21953	BCKDHB	0.518695	0.000771158
P54819	AK2	0.51855	0.0193241
Q9UN86	G3BP2	0.514902	0.0014814
Q13227	GPS2	0.514371	0.00795489
Q5JPI9	METTL10; EEF1AKMT2	0.514314	0.0359697
Q6YN16	HSDL2	0.513396	2.12194e-05
Q9Y6Q3	ZFP37	0.510824	0.00763187
Q8IVL6	LEPREL2; P3H3	0.506915	0.00297003
Q9HCJ3	RAVER2	0.502876	0.0137527
P30101	PDIA3	0.502674	0.012206
